# Supplementary material for: High enrichment of heavy metals in fine particulate matter through dust aerosol generation
Source: Copernicus journal article supplement (doi:10.5194/acp-23-13049-2023), 2023-10-17
Supplement: Supplementary file 1 [file acp-23-13049-2023-supplement.pdf]

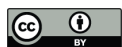

*Supplement of*

## **High enrichment of heavy metals in fine particulate matter through dust aerosol generation**

**Qianqian Gao et al.**

*Correspondence to:* Hongliang Zhang (zhanghl@fudan.edu.cn), Jianmin Chen (jmchen@fudan.edu.cn), and Xiaofei Wang (xiaofeiwang@fudan.edu.cn)

The copyright of individual parts of the supplement might differ from the article licence.

# Supplementary Information

1

2

3 **This file includes 3 Texts, 8 Tables and 17 Figures:**

4 **Text S1.** Soil texture characterization.

5 **Text S2.** Inverse Distance Weight (IDW).

6 **Text S3.** A one-way Analysis of Variance (ANOVA) analysis.

7 **Table S1.** The weight percent of heavy metal in dust-PM<sub>2.5</sub>, dust-PM<sub>10</sub> and dust-PM<sub>30</sub> are shown in

8 SPECIATE datasets.

9 **Table S2.** Soil properties: pH and soil texture.

10 **Table S3.** Mass collected in dust aerosols of PM<sub>2.5</sub> and PM<sub>10</sub>.

11 **Table S4.** Mass collected in MOUDI samples.

12 **Supplementary Figure S1.** Soil sampling locations.

13 **Supplementary Figure S2.** Experimental setup.

14 **Supplementary Figure S3.** Comparison of the absolute concentrations of heavy metals in the S1-

15 S14 natural soil samples and dust aerosols.

16 **Supplementary Figure S4.** Comparison of the absolute concentrations of heavy metals between

17 natural soil samples and dust aerosols.

18 **Supplementary Figure S5.** Correlation between soils and PM<sub>10</sub>.

19 **Supplementary Figure S6.** Significance between soils and PM<sub>2.5</sub> in heavy metals.

20 **Supplementary Figure S7.** The enrichment factor of heavy metals in PM<sub>2.5</sub> and PM<sub>10</sub> dust aerosols.

21 **Supplementary Figure S8.** Particle size distribution of dust aerosols produced from S9 and S14.

22 **Supplementary Figure S9.** SEM images of the soil and dust aerosols (generated from S10).

23 **Supplementary Figure S10.** Absolute concentrations of heavy metals in MOUDI samples.

24 **Supplementary Figure S11.** Modeling of the contributions of As in dust aerosols to atmospheric  
25 heavy metals.

26 **Supplementary Figure S12.** Modeling of the contributions of Cu in dust aerosols to atmospheric  
27 heavy metals.

28 **Supplementary Figure S13.** Modeling of the contributions of Mn in dust aerosols to atmospheric  
29 heavy metal.

30 **Supplementary Figure S14.** Modeling of the contributions of Ti in dust aerosols to atmospheric  
31 heavy metals.

32 **Supplementary Figure S15.** Modeling of the contributions of Zn in dust aerosols to atmospheric  
33 heavy metal.

34 **Supplementary Figure S16.** Backward trajectories.

35 **Supplementary Figure S17.** Averaged mass spectra of dust particle cluster.

36

37 **Text S1.** Soil texture characterization

38 To measure the particle size distribution of the soil, approximately 0.03 to 0.5 g of air-dried  
39 soil samples were first passed through a 2 mm sieve. Subsequently, 10 mL of distilled water was  
40 added to the soil, and a dispersant was used to adjust the pH based on the soil's alkalinity or acidity.  
41 The dispersant consisted of either 1 to 1.5 mL of 0.5 mol/L hexametaphosphate (HMP) or 0.5 mol/L  
42 sodium hydroxide (NaOH). The mixture was then left to soak overnight before undergoing  
43 ultrasonic vibration for 2 minutes. Finally, the Laser Scattering Particle Size Distribution Analyzer  
44 (LA-960) was utilized to measure the soil samples labeled as S1-S14.

45

46 **Text S2.** Inverse Distance Weight (IDW)

47 IDW is a point-based interpolation method (Harman et al., 2016). The value at point ( $N_0$ ) is  
48 calculated through the following formula.

49 
$$N_0 = \frac{\sum_{i=1}^n N_i \cdot P_i}{\sum_{i=1}^n P_{ii}} \quad (1)$$

50 Where  $n$  represents the number of measurement points.  $N_i$  represents the value at point  $i$ .  $P_i$  is the  
51 weight of the value at  $i$  position. The weight  $P_i$  can be calculated with Eq. (2) below as a function  
52 of the distance between the reference point and the interpolation point following from the idea that  
53 the effect of the closer points is higher than distance ones (Macedonio and Pareschi, 1991).

54 
$$p_i = \frac{1}{d_i^k} \quad i = 1, 2, \dots, n \quad (2)$$

55 Where  $d_i$  is the horizontal distance between the interpolation point at ( $x_0, y_0$ ) and the reference points  
56 at ( $x_i, y_i$ ) and is calculated by Eq. (3).  $k$  is the power of the distance.

57 
$$d_i = \sqrt{(x_i - x_0)^2 + (y_i - y_0)^2} \quad (3)$$

58

59 **Text S3.** A one-way Analysis of Variance (ANOVA) analysis

60 To examine the relationship between soil texture and their corresponding enrichment factors  
61 (EFs), a one-way Analysis of Variance (ANOVA) test was conducted using SPSS. When comparing  
62 the differences among the six types of sandy soils (S2, S4, S7, S10, S11, and S12), enter the average  
63 EF values (dust-PM<sub>2.5</sub> and dust-PM<sub>10</sub>) for the six types of sandy soils in the software, and then select  
64 one-way ANOVA with a confidence level of 0.05.

65 To compare the differences in enrichment factors among different soil types, considering that  
66 the number of soil samples for each type was not equal, calculate the average enrichment factor for  
67 each type using two or more soil samples of the same type. Then, input the average enrichment  
68 factors (dust-PM<sub>2.5</sub> and dust-PM<sub>10</sub>) for each type of soil (silty loam, sand, sandy loam, loam, loam  
69 sand, and silty clay loam) into the software and perform the aforementioned operations. The data  
70 and specific results can be found in Table S5-S8.

71

72 **Table S1.** The weight percent of heavy metal in dust-PM<sub>2.5</sub>, dust-PM<sub>10</sub> and dust-PM<sub>30</sub> are shown in  
73 SPECIATE datasets (Profile NO.41350). Here, profile numbers 453102.5, 4531010 and 4531030  
74 were used.

| Heavy metal | Weight percent    |                  |                  |
|-------------|-------------------|------------------|------------------|
|             | PM <sub>2.5</sub> | PM <sub>10</sub> | PM <sub>30</sub> |
| V           | 0.014             | 0.015            | 0.012            |
| Cr          | 0.011             | 0.013            | 0.013            |
| Mn          | 0.096             | 0.103            | 0.056            |
| Ni          | 0.004             | 0.004            | 0.008            |
| Cu          | 0.035             | 0.05             | 0.044            |
| Zn          | 0.039             | 0.045            | 0.042            |
| As          | 0                 | 0.002            | 0.002            |
| Cd          | 0.008             | 0.004            | 0.003            |
| Ba          | 0                 | 0.012            | 0.042            |
| Ti          | 0.335             | 0.362            | 0.171            |
| Pb          | 0.053             | 0.044            | 0.05             |

75

76 **Table S2.** Soil properties: pH and soil texture

| <b>Soil Number</b> | <b>Location</b>                | <b>pH</b> | <b>Soil texture</b> |
|--------------------|--------------------------------|-----------|---------------------|
| <b>S1</b>          | Ulanqab, Inner Mongolia        | 7.8       | silty loam          |
| <b>S2</b>          | Bai Yin Chagan, Inner Mongolia | 7.5       | sand                |
| <b>S3</b>          | Bai Yin Chagan, Inner Mongolia | 7.7       | sandy loam          |
| <b>S4</b>          | Hohhot, Inner Mongolia         | 7.7       | sand                |
| <b>S5</b>          | Yumen East Town, Jiayuguan     | 8.1       | loam                |
| <b>S6</b>          | Yinda Town, Jiayuguan          | 8.0       | loam                |
| <b>S7</b>          | Xitushan, Jiayuguan            | 8.0       | sand                |
| <b>S8</b>          | Yema Bay, Jiayuguan            | 7.7       | loamy sand          |
| <b>S9</b>          | Pingliang City, Gansu Province | 7.6       | silty clay loam     |
| <b>S10</b>         | Alxa, Inner Mongolia           | 8.1       | sand                |
| <b>S11</b>         | Alxa, Inner Mongolia           | 8.1       | sand                |
| <b>S12</b>         | Alxa, Inner Mongolia           | 7.9       | sand                |
| <b>S13</b>         | Bayingoleng, Xinjiang          | 7.9       | loamy sand          |
| <b>S14</b>         | Fudan university, Shanghai     | 7.5       | silty clay loam     |

77

78 **Table S3.** Mass collected in dust aerosols of PM<sub>2.5</sub> and PM<sub>10</sub>.

| EXP                  | S1<br>mass<br>(g) | S2<br>mass<br>(g) | S3<br>mass<br>(g) | S4<br>mass<br>(g) | S5<br>mass<br>(g) | S6<br>mass<br>(g) | S7<br>mass<br>(g) | S8<br>mass<br>(g) | S9<br>mass<br>(g) | S10<br>mass<br>(g) | S11<br>mass<br>(g) | S12<br>mass<br>(g) | S13<br>mass<br>(g) | S14<br>mass<br>(g) |
|----------------------|-------------------|-------------------|-------------------|-------------------|-------------------|-------------------|-------------------|-------------------|-------------------|--------------------|--------------------|--------------------|--------------------|--------------------|
| PM <sub>2.5</sub> -1 | 0.0034            | 0.0498            | 0.0271            | 0.0186            | 0.0322            | 0.015             | 0.013             | 0.0261            | 0.0257            | 0.0229             | 0.012              | 0.0343             | 0.0534             | 0.0751             |
| PM <sub>2.5</sub> -2 | 0.044             | 0.0424            | 0.0309            | 0.0228            | 0.0293            | 0.0221            | 0.0198            | 0.0341            | 0.0171            | 0.0297             | 0.0199             | 0.0388             | 0.0529             | 0.0585             |
| PM <sub>2.5</sub> -3 | 0.0368            | 0.021             | 0.0244            | 0.0245            | 0.0181            | 0.0149            | 0.0219            | 0.0335            | 0.0321            | 0.0375             | 0.0232             | 0.0337             | 0.0564             | 0.0859             |
| PM <sub>10</sub> -1  | 0.0738            | 0.0706            | 0.0521            | 0.0543            | 0.0606            | 0.0376            | 0.0591            | 0.081             | 0.0898            | 0.0806             | 0.097              | 0.0653             | 0.0903             | 0.0607             |
| PM <sub>10</sub> -2  | 0.0743            | 0.0765            | 0.0877            | 0.0384            | 0.0579            | 0.0255            | 0.0505            | 0.0732            | 0.0849            | 0.0749             | 0.126              | 0.0602             | 0.0872             | 0.0769             |
| PM <sub>10</sub> -3  | 0.0775            | 0.0691            | 0.0765            | 0.0282            | 0.0625            | 0.0266            | 0.0592            | 0.0765            | 0.089             | 0.0845             | 0.0772             | 0.0674             | 0.0922             | 0.0763             |

79

80 **Table S4.** Mass collected in MOUDI samples. Here, an S10 sample was used.

81

| Sample      | EXP1<br>mass (g) | EXP2<br>mass (g) | EXP3<br>mass (g) |
|-------------|------------------|------------------|------------------|
| PM >10      | 0.0738           | 0.0891           | 0.0476           |
| PM 5.6~10   | 0.0315           | 0.0531           | 0.0112           |
| PM 3.2~5.6  | 0.0243           | 0.0381           | 0.0132           |
| PM 1.8~3.2  | 0.0176           | 0.0206           | 0.0074           |
| PM 1.0~1.8  | 0.0059           | 0.0102           | 0.0074           |
| PM 0.56~1.0 | 0.0056           | 0.0037           | 0.0032           |

82

83

84 **Table S5.** A one-way Analysis of Variance (ANOVA) analysis was conducted in dust-PM<sub>2.5</sub>  
85 among sandy soils (S2, S4, S7, S10, S11, and S12).

86

| Origin of disparities | SS       | df | MS       | F       | P-value  | F crit   |
|-----------------------|----------|----|----------|---------|----------|----------|
| Between the group     | 15.62294 | 5  | 3.124589 | 3.79773 | 0.004393 | 2.353809 |
| Within the group      | 54.30161 | 66 | 0.822752 |         |          |          |
| Total                 | 69.92456 | 71 |          |         |          |          |

87

88

89 **Table S6.** A one-way Analysis of Variance (ANOVA) analysis was conducted in dust-PM<sub>10</sub> among  
90 sandy soils (S2, S4, S7, S10, S11, and S12).

91

| Origin of disparities | SS       | df | MS       | F        | P-value  | F crit   |
|-----------------------|----------|----|----------|----------|----------|----------|
| Between the group     | 14.74211 | 5  | 2.948422 | 31.17927 | 3.79E-16 | 2.353809 |
| Within the group      | 6.241193 | 66 | 0.094564 |          |          |          |
| Total                 | 20.9833  | 71 |          |          |          |          |

92

93



94 **Table S7.** A one-way Analysis of Variance (ANOVA) analysis was conducted in dust-PM<sub>2.5</sub>  
 95 among six different soil types (silty loam; sand; sandy loam; loam; loam sand and silty clay loam).  
 96

| Origin of disparities | SS       | df | MS       | F        | <i>P</i> -value | F crit   |
|-----------------------|----------|----|----------|----------|-----------------|----------|
| Between the group     | 78.82538 | 5  | 15.76508 | 15.56416 | 4.28E-10        | 2.353809 |
| Within the group      | 66.852   | 66 | 1.012909 |          |                 |          |
| Total                 | 145.6774 | 71 |          |          |                 |          |

97  
 98 **Table S8.** A one-way Analysis of Variance (ANOVA) analysis was conducted in dust-PM<sub>10</sub> among  
 99 six different soil types (silty loam; sand; sandy loam; loam; loam sand and silty clay loam).  
 100

| Origin of disparities | SS       | df | MS       | F        | <i>P</i> -value | F crit   |
|-----------------------|----------|----|----------|----------|-----------------|----------|
| Between the group     | 6.130101 | 5  | 1.22602  | 19.79507 | 5.35E-12        | 2.353809 |
| Within the group      | 4.087752 | 66 | 0.061936 |          |                 |          |
| Total                 | 10.21785 | 71 |          |          |                 |          |

101

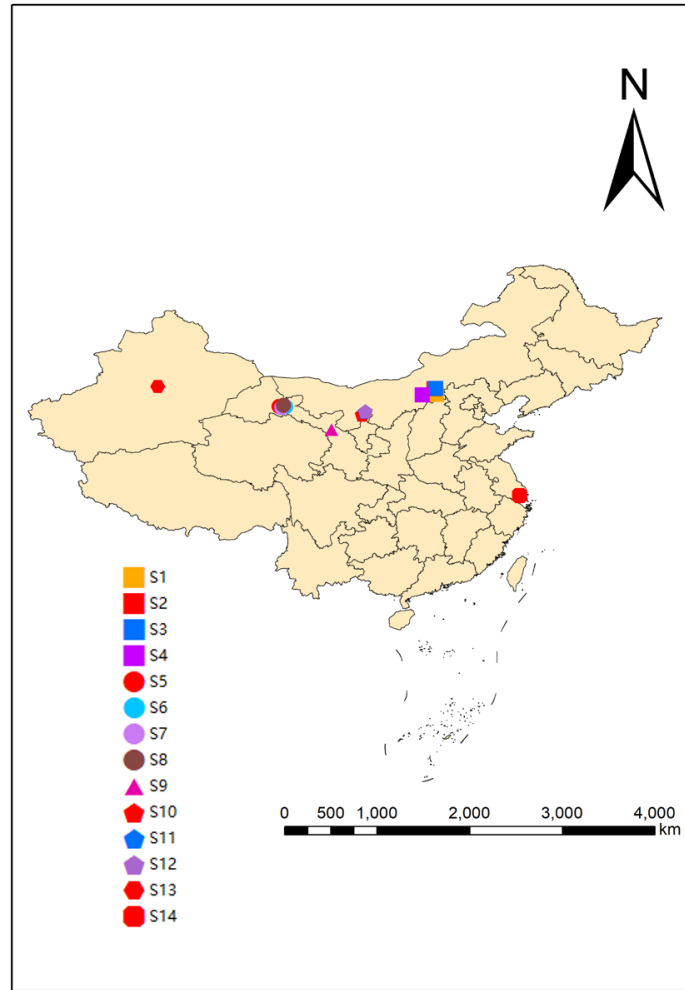

102

103 **Supplementary Figure S1. Soil sampling locations.** S1-S4 were collected from dust sources of

104 the northern slope of Yin-shan Mountain in central inner Mongolia and the adjacent areas of the

105 Hunshandake Sandy Land (S1: 113.26°E, 41.01°N; S2: 113.0°E, 41.55°N; S3: 113.13, 41.58°N; S4:

106 111.85°E, 40.93), S5-S12 were collected from dust sources of Hexi Corridor and Alxa Plateau (S5:

107 97.92°E, 39.81°N; S6: 98.56°E, 39.80°N; S7: 98.20°E, 39.7°N; S8: 98.37°E, 39.94°N; S9: 103.02°E,

108 37.59°N; S10: 106.01°E, 39.05°N; S11: 106.31°E, 39.34°N; S12: 106.33°E, 39.37°N); S13 was

109 collected in Xinjiang Province, in the dust sources of the Taklimakan Desert (86.15°E, 41.76°N),

110 and S14 was sampled from Shanghai Yangpu District (121.51°E, 31.34°N).

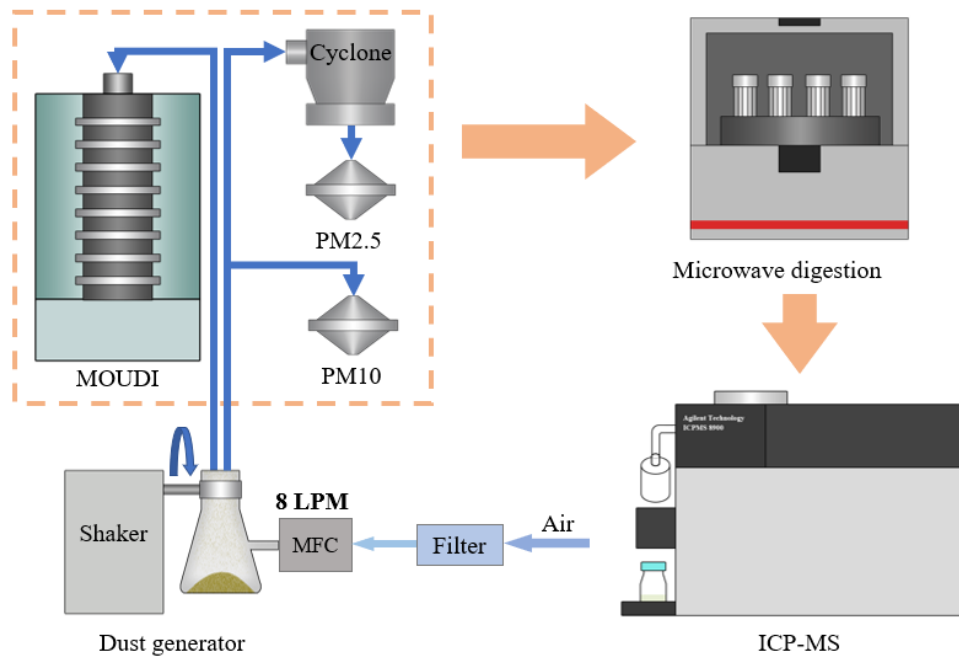

111

112 **Supplementary Figure S2. Experimental setup.** The setup consists of four parts: a dust generation

113 system (Shaker), a dust particle size separation system (PM<sub>2.5</sub> Cyclone and MOUDI), a dust

114 collection system (Filter holder), and the chemical analysis instrument (ICP-MS).

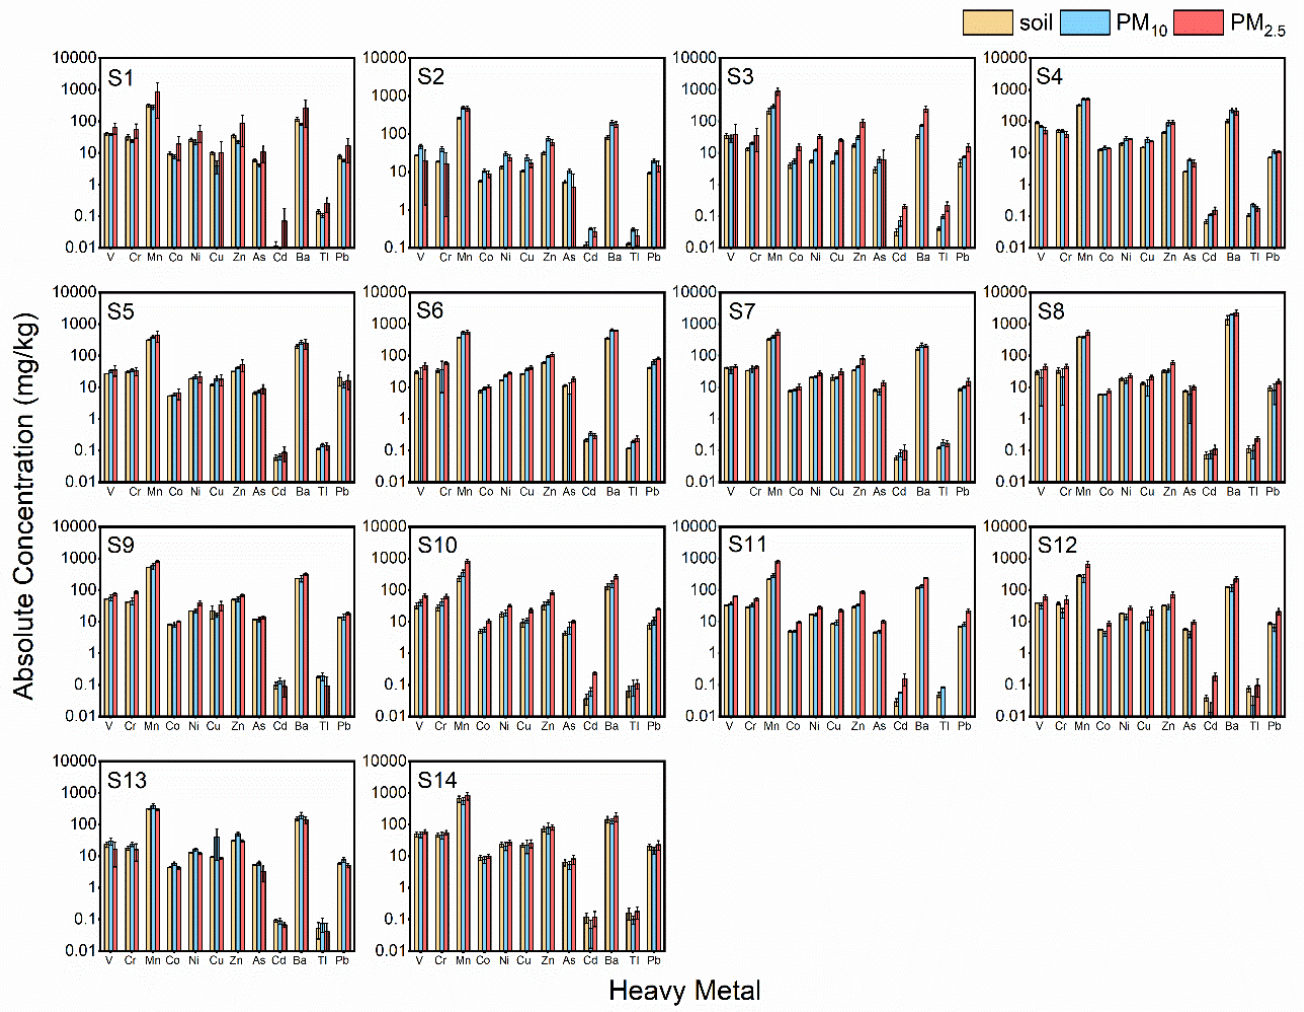

115

116 **Supplementary Figure S3. Comparison of the absolute concentrations of heavy metals in the**

117 **S1-S14 natural soil samples and dust aerosols. The whiskers on the bars represent the standard**

118 **deviations of triplicates.**

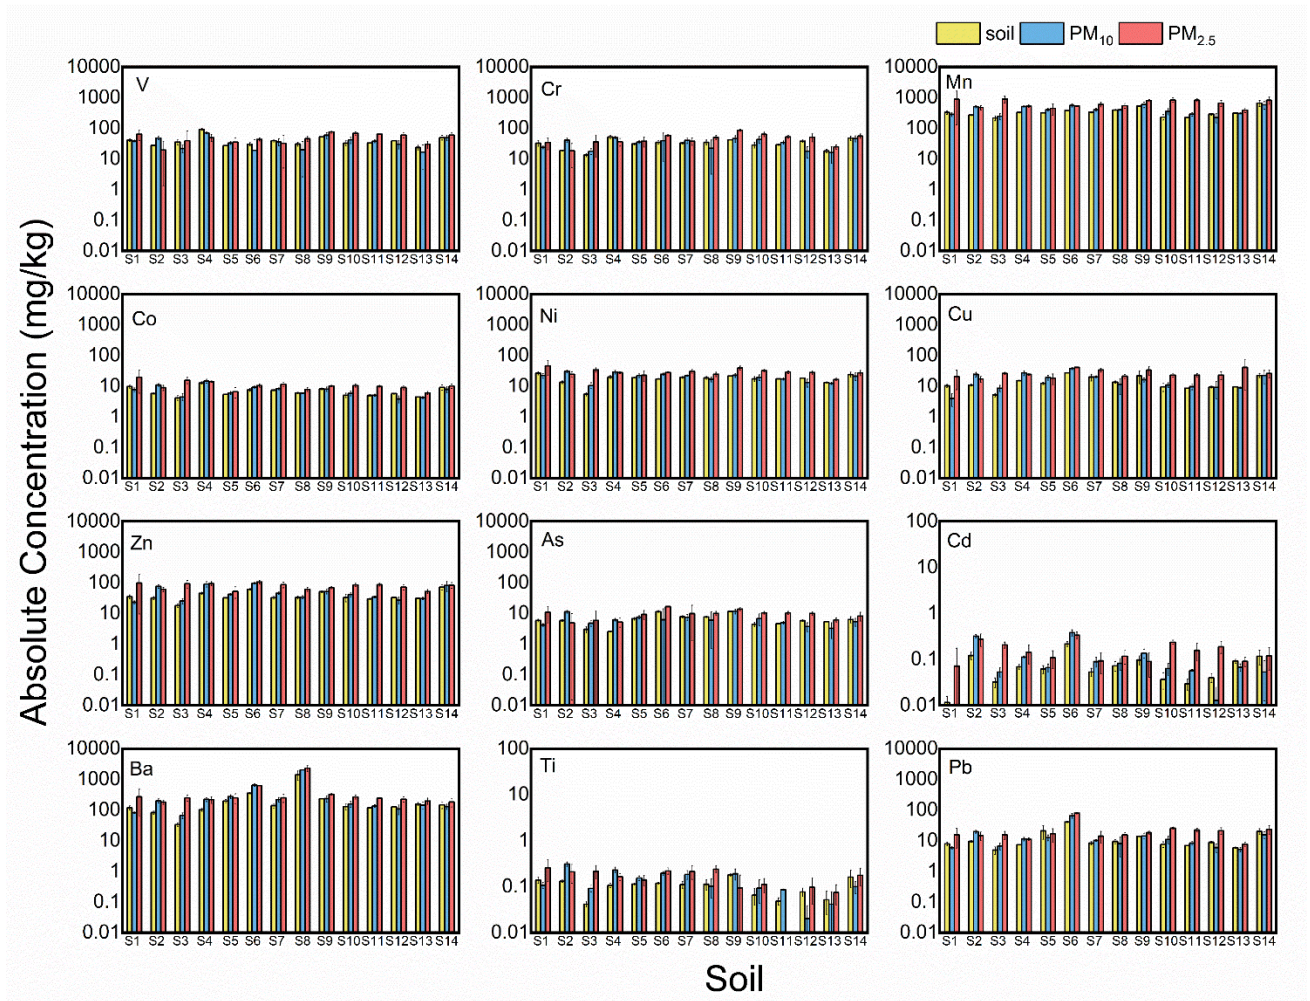

119

120 **Supplementary Figure S4. Comparison of the absolute concentrations of heavy metals**

121 **between natural soil samples and dust aerosols.** The whiskers on the bars represent the standard

122 deviations of triplicates.

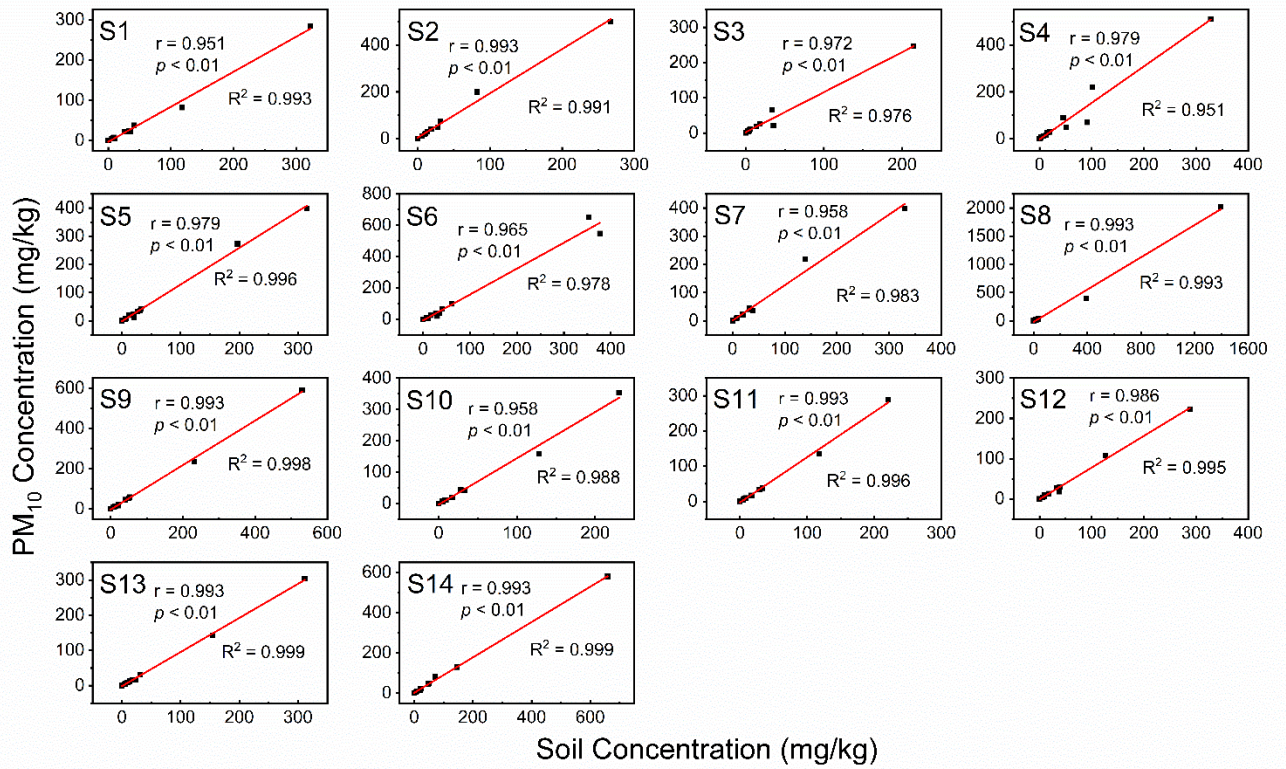

123

124 **Supplementary Figure S5. Correlation between soils and PM<sub>10</sub>.** PM<sub>10</sub> obtained by S1-S14 was

125 compared with parent soils.

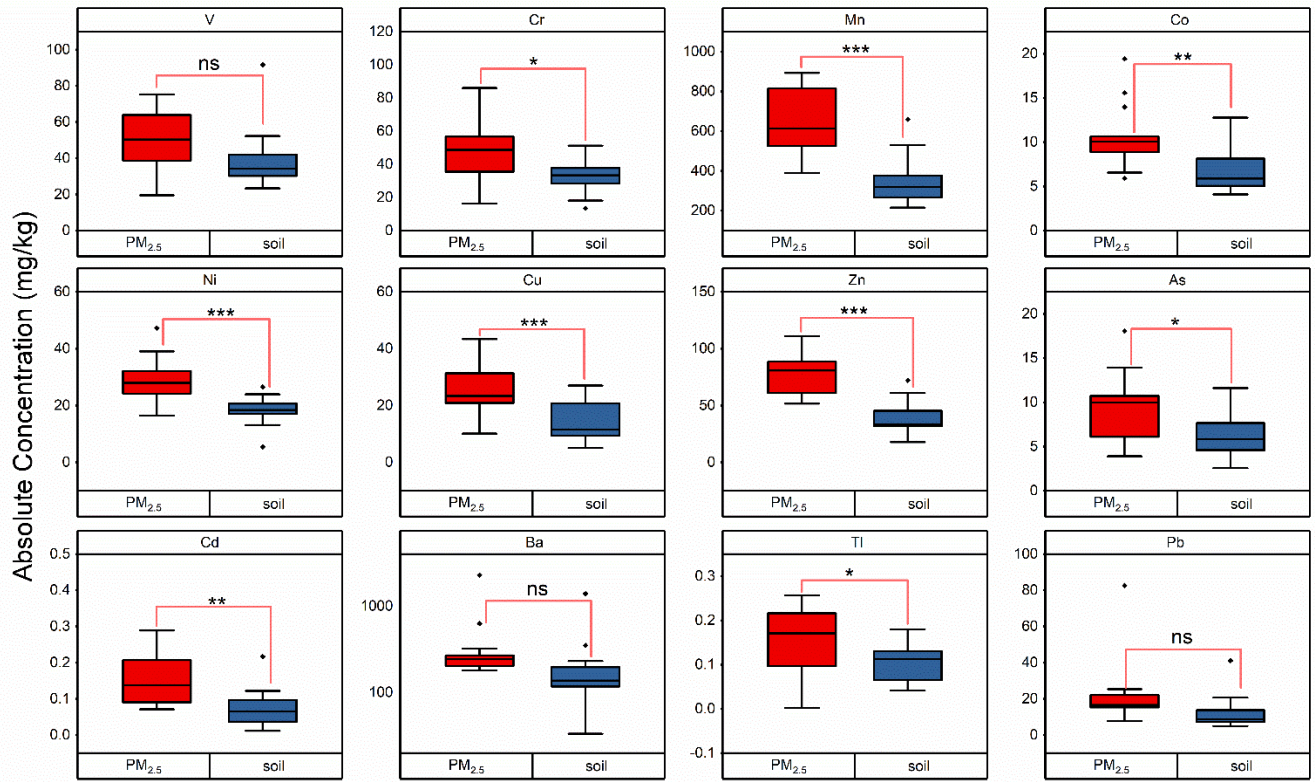

The differences between soil and PM<sub>2.5</sub>

126

127

Notes: ns: not significant

128

\*: 0.05 < p < 0.01

129

\*\* : 0.01 < p < 0.001

130

\*\*\*: p < 0.001

131

**Supplementary Figure S6. Significance of the differences in heavy metal contents between soils**

132

**and PM<sub>2.5</sub>.** Heavy metals in dust-PM<sub>2.5</sub> obtained by S1-S14 were compared with parent soils.

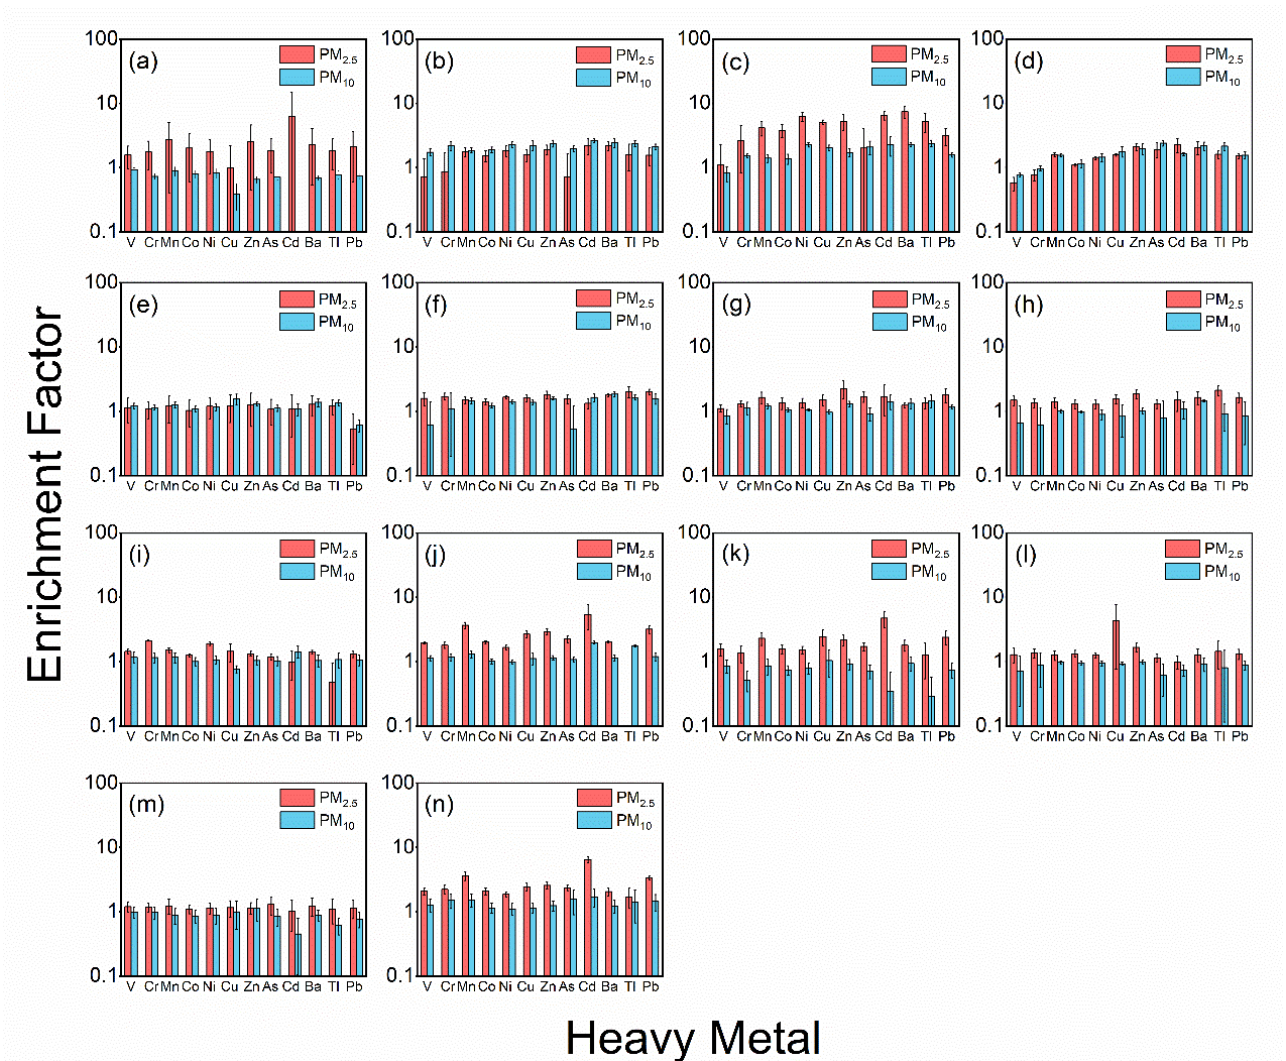

133

134 **Supplementary Figure S7. Enrichment factor of heavy metals in dust-PM<sub>2.5</sub> and dust-PM<sub>10</sub>.**

135 The whiskers on the bars represent the standard deviations of triplicates.



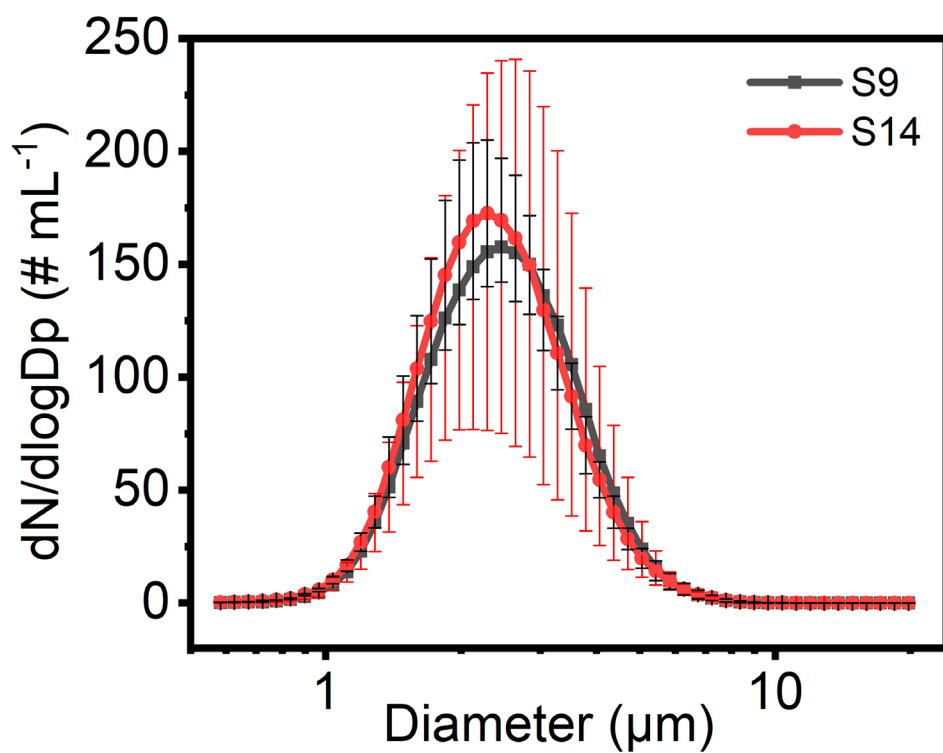

136

137 **Supplementary Figure S8. Particle size distribution of dust aerosols produced from soil S9 and**

138 **S14.** The size distribution was detected by an Aerodynamic Particle Sizer (APS), which size range

139 are 0.5-20 µm.

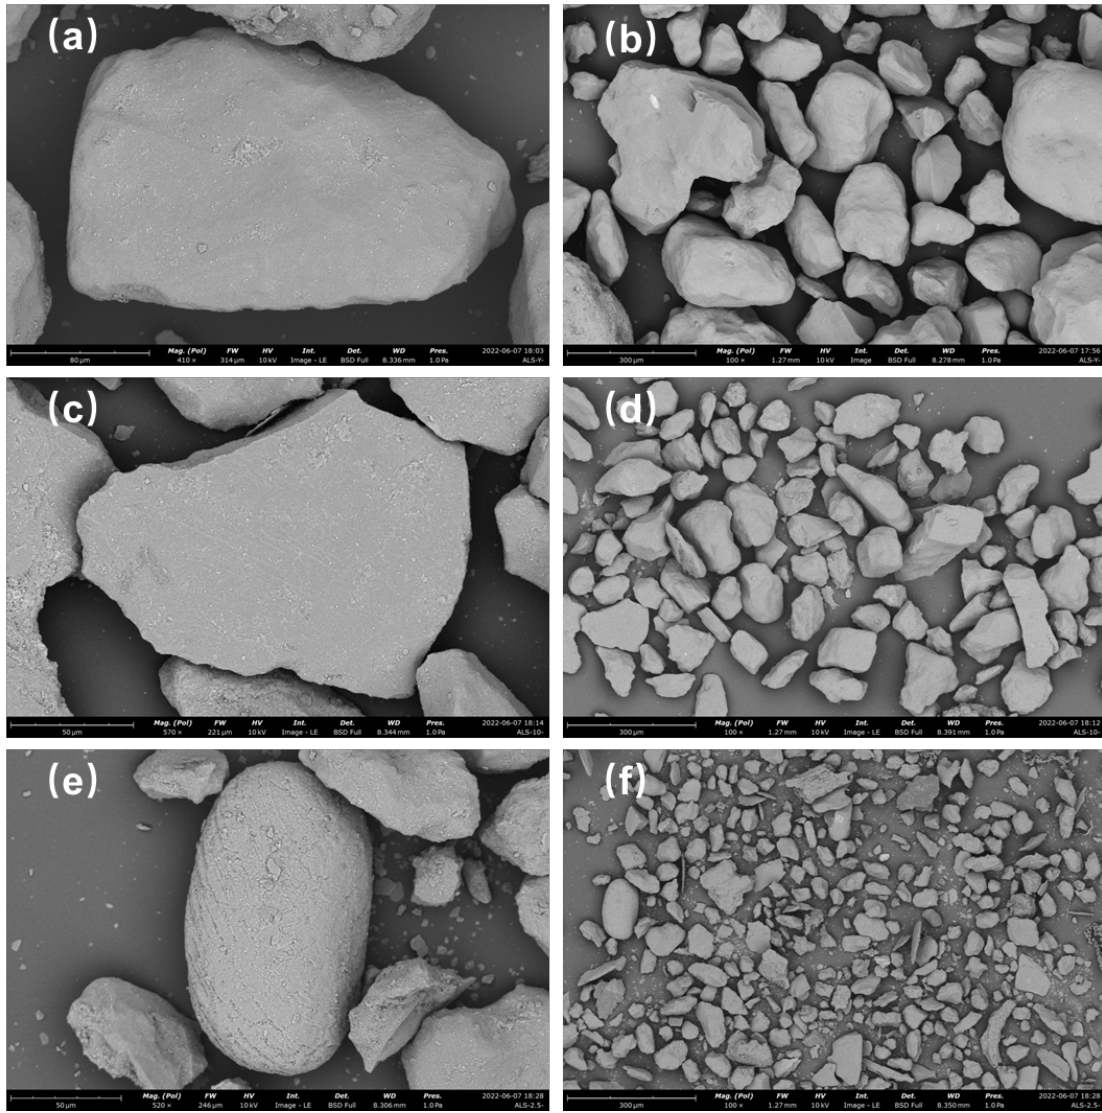

140

141 **Supplementary Figure S9. SEM images of the soil and dust aerosols (generated from soil S10).**

142 (a) and (b) are natural soil images; (c) and (d) are dust-PM<sub>10</sub>; and (e), (f) are dust-PM<sub>2.5</sub>.

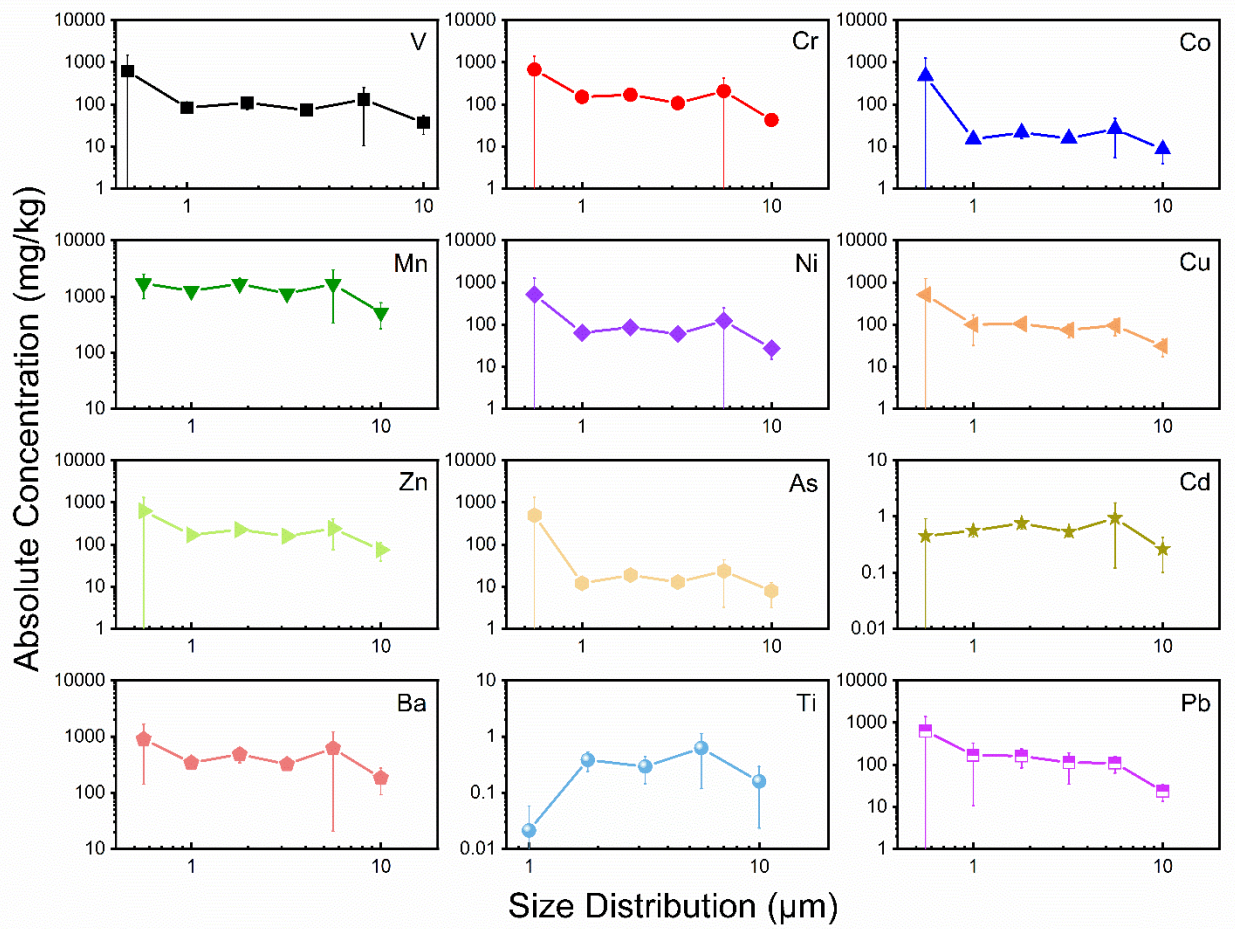

143

144 **Supplementary Figure S10. Absolute concentrations of heavy metals in MOUDI samples.**

145 The particles sizes are above 10 μm, 5.6-10 μm, 3.2-5.6 μm, 1.8-3.2 μm, 1.0-1.8 μm, and 0.56-

146 1.0 μm, respectively. Here, soil S10 was used.

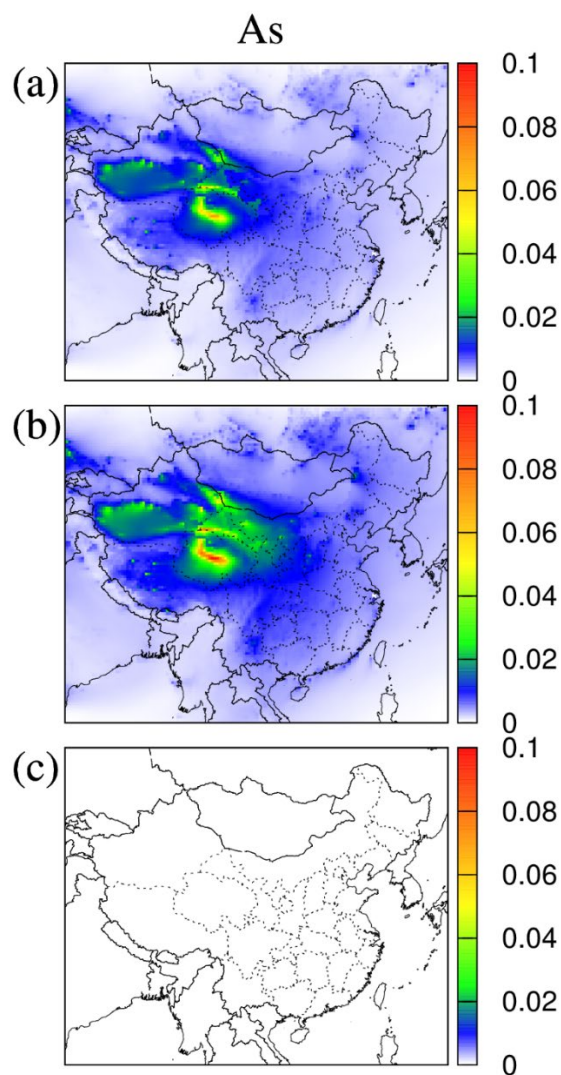

147

148 **Supplementary Figure S11. Modeling of the contributions of As in dust aerosols to**

149 **atmospheric heavy metals.** These show the modeled results of As using the dust profiles of

150 measured soil (a), dust-PM<sub>2.5</sub> (b), and the SPECIATE datasets (c). The unit is  $\mu g/m^3$ .

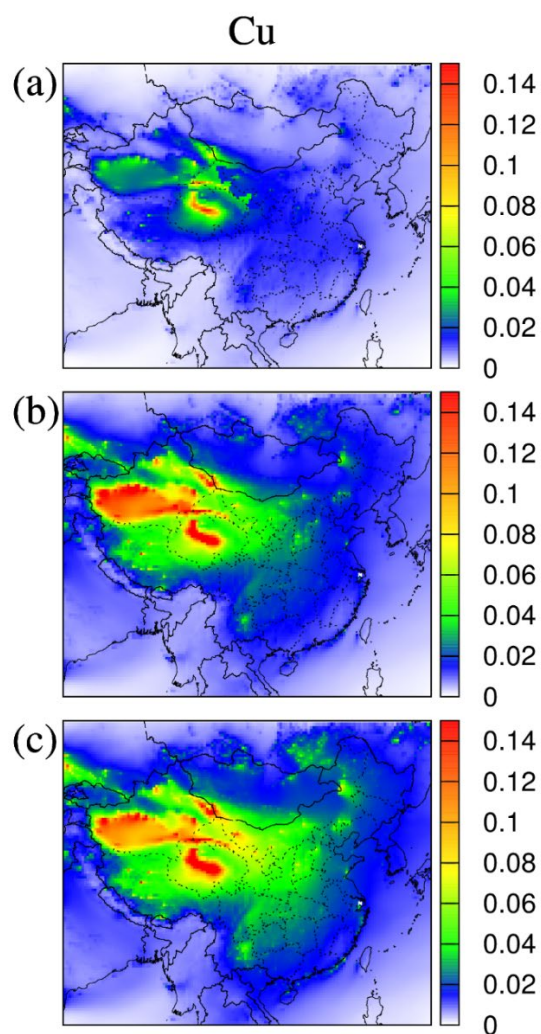

151

152 **Supplementary Figure S12. Modeling of the contributions of Cu in dust aerosols to**  
153 **atmospheric heavy metals.** These show the modeled results of Cu using the dust profiles of  
154 measured soil (a), dust-PM<sub>2.5</sub> (b), and the SPECIATE datasets (c). The unit is  $\mu\text{g}/\text{m}^3$ .

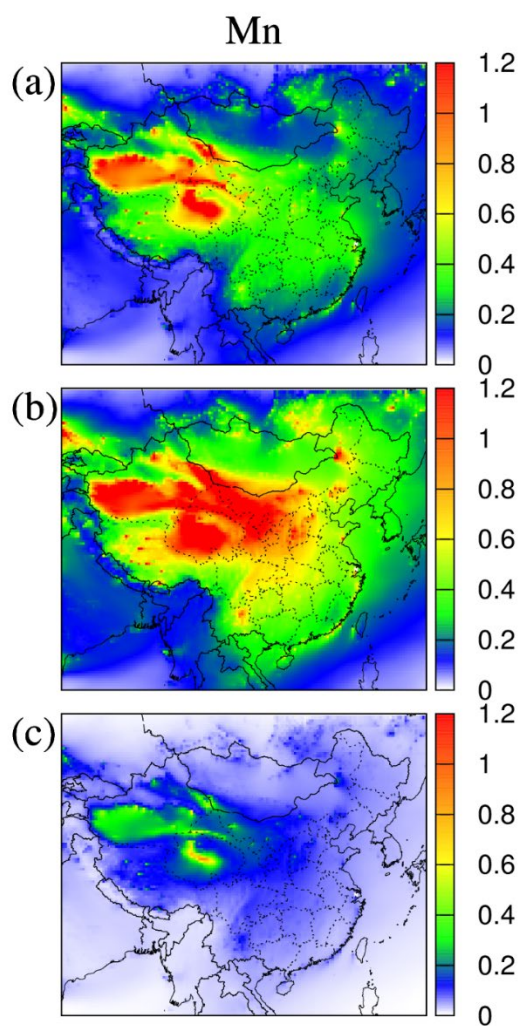

155

156 **Supplementary Figure S13. Modeling of the contributions of Mn in dust aerosols to**  
157 **atmospheric heavy metals.** These show the modeled results of Mn using the dust profiles of  
158 measured soil (a), dust-PM<sub>2.5</sub> (b), and the SPECIATE datasets (c). The unit is  $\mu\text{g}/\text{m}^3$ .

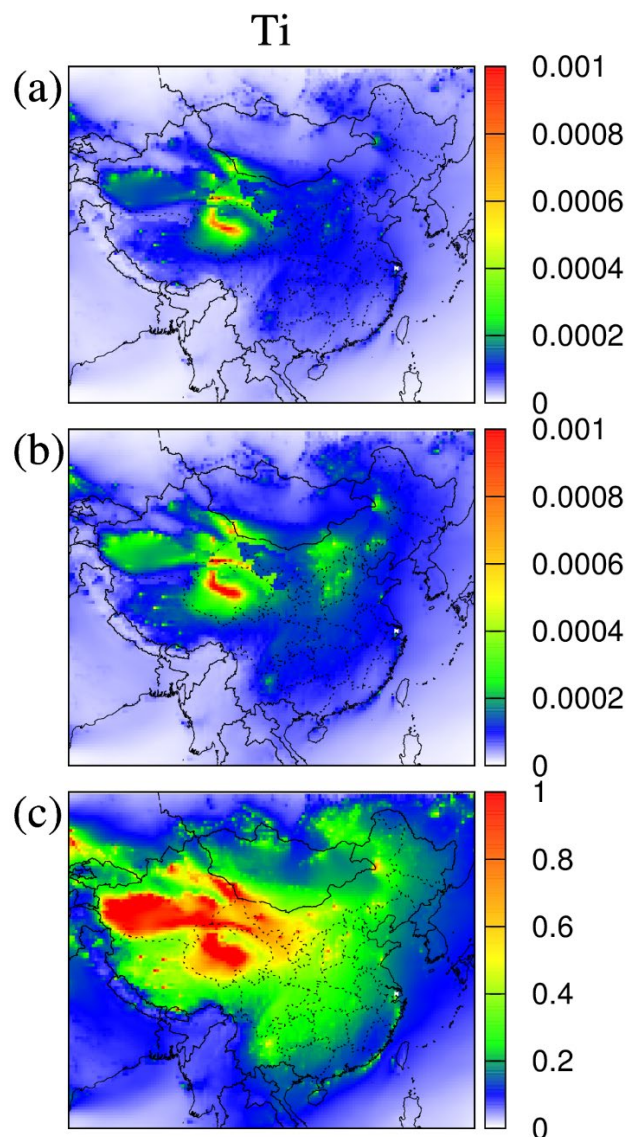

159

160 **Supplementary Figure S14. Modeling of the contributions of Ti in dust aerosols to atmospheric**

161 **heavy metals.** These show the modeled results of Ti using the dust profiles of measured soil (a),

162 dust-PM<sub>2.5</sub> (b), and the SPECIATE datasets (c). The unit is  $\mu\text{g}/\text{m}^3$ .

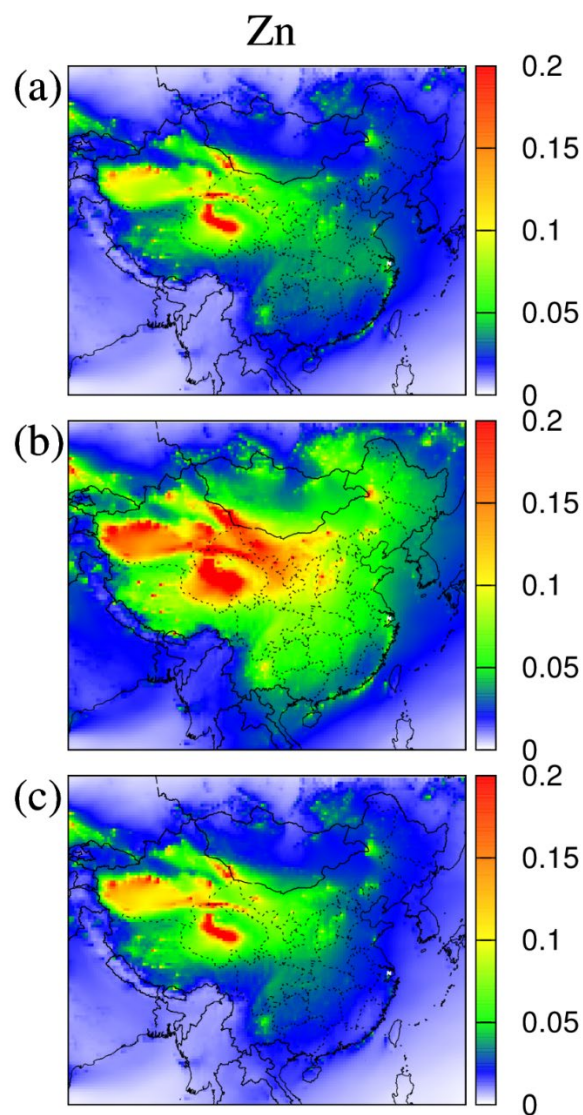

163

164 **Supplementary Figure S15. Modeling of the contributions of Zn in dust aerosols to**  
 165 **atmospheric heavy metals.** These show the modeled results of Zn using the dust profiles of  
 166 measured soil (a), dust-PM<sub>2.5</sub> (b), and the SPECIATE datasets (c). The unit is  $\mu\text{g}/\text{m}^3$ .



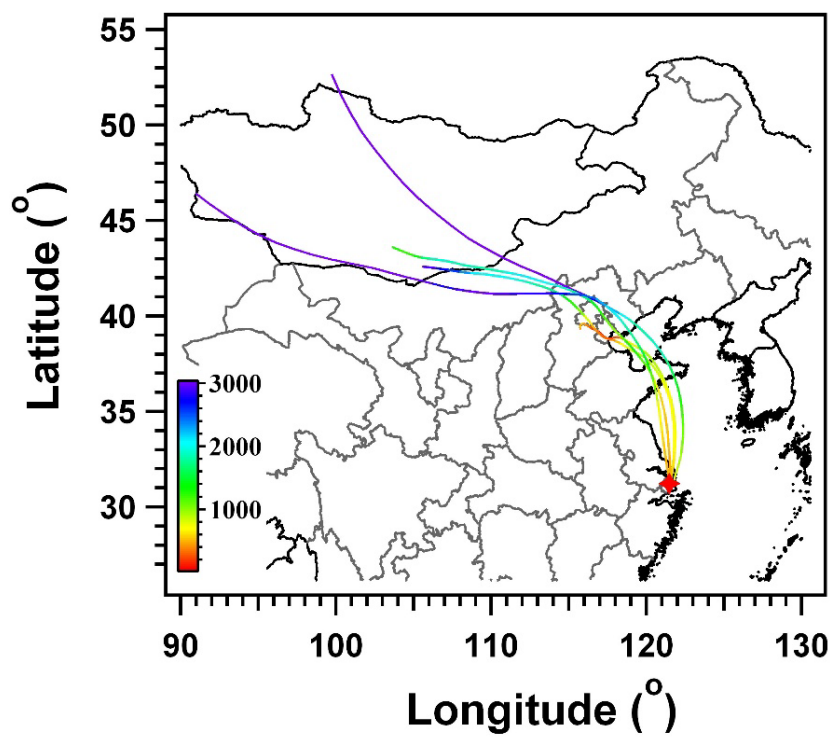

167

168 **Supplementary Figure S16. Backward trajectories.** The HYSPLIT 48-hour air mass backward

169 trajectories at 500 m arrival height ending at 22:00 UTC+8 on 23 May, 2018.

170

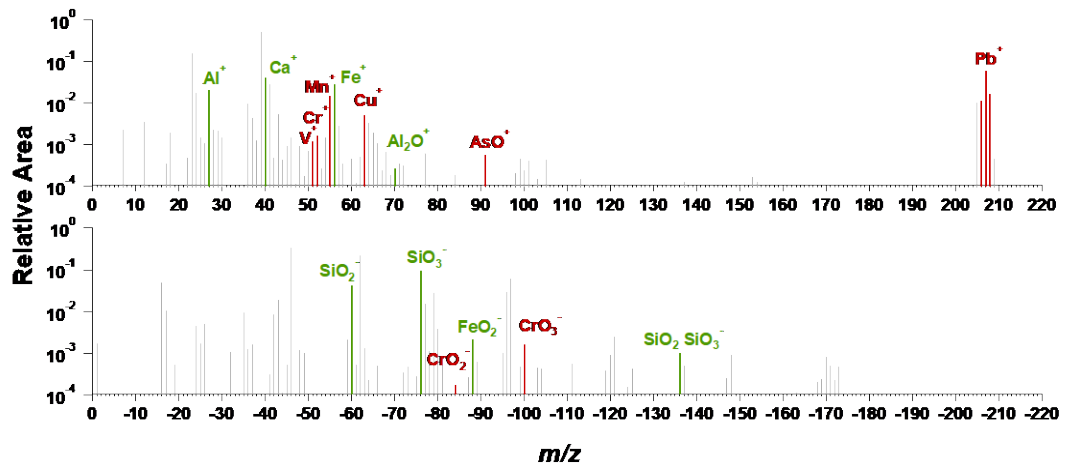

171

172 **Supplementary Figure S17. Averaged mass spectra of dust particle cluster.** The green sticks are

173 typical dust markers; the red sticks are typical heavy metal markers.

174 **Reference**

175 Harman, B. I., Koseoglu, H., and Yigit, C. O.: Performance evaluation of IDW, Kriging and  
176 multiquadric interpolation methods in producing noise mapping: A case study at the city of Isparta,  
177 Turkey, *Applied Acoustics*, 112, 147-157, 10.1016/j.apacoust.2016.05.024, 2016.

178 Macedonio, G. and Pareschi, M. T.: An algorithm for the triangulation of arbitrarily distributed  
179 points - Applications to volume estimate and terrain fitting *Computers & Geosciences*, 17, 859-874,  
180 10.1016/0098-3004(91)90086-s, 1991.
